# Supplementary material for: Genome-wide screen uncovers novel host factors for L-A virus maintenance and a mutualistic-symbiosis relationship in yeast
Source: Research Square preprint supplement (doi:10.21203/rs.3.rs-7017668/v1), 2025-07-14
Supplement: Supplementary file 1 [file 1d8a870146d87ce612a154e3.docx]

**Genome-wide screen uncovers novel host factors for L-A virus maintenance and a mutualistic-symbiosis relationship in yeast**

Hsiao *et al*.

**Supplementary Material**


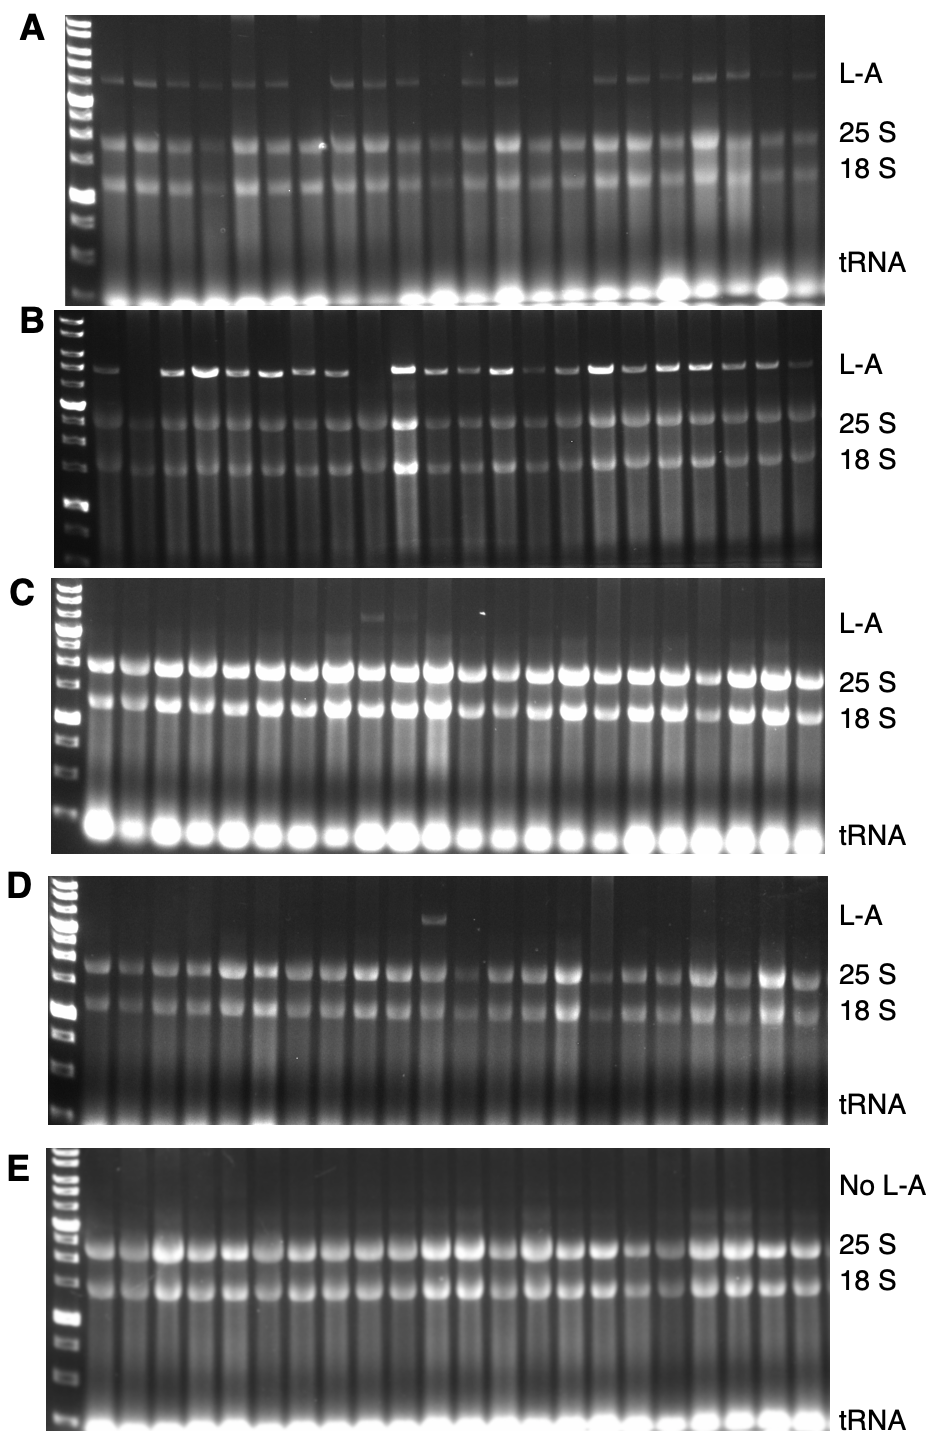


**Supplementary Figure 1*.* Genome-wide screen for L-A-maintaining gene products using a collection of the yeast-gene-knockout strains.**  Panels A–E represent five successive rounds of visual elimination. For example, in panel A, most of the knockout strains still contain L-A dsRNA. Only those strains with significantly reduced L-A levels were selected for the second round of elimination (see Materials and methods).


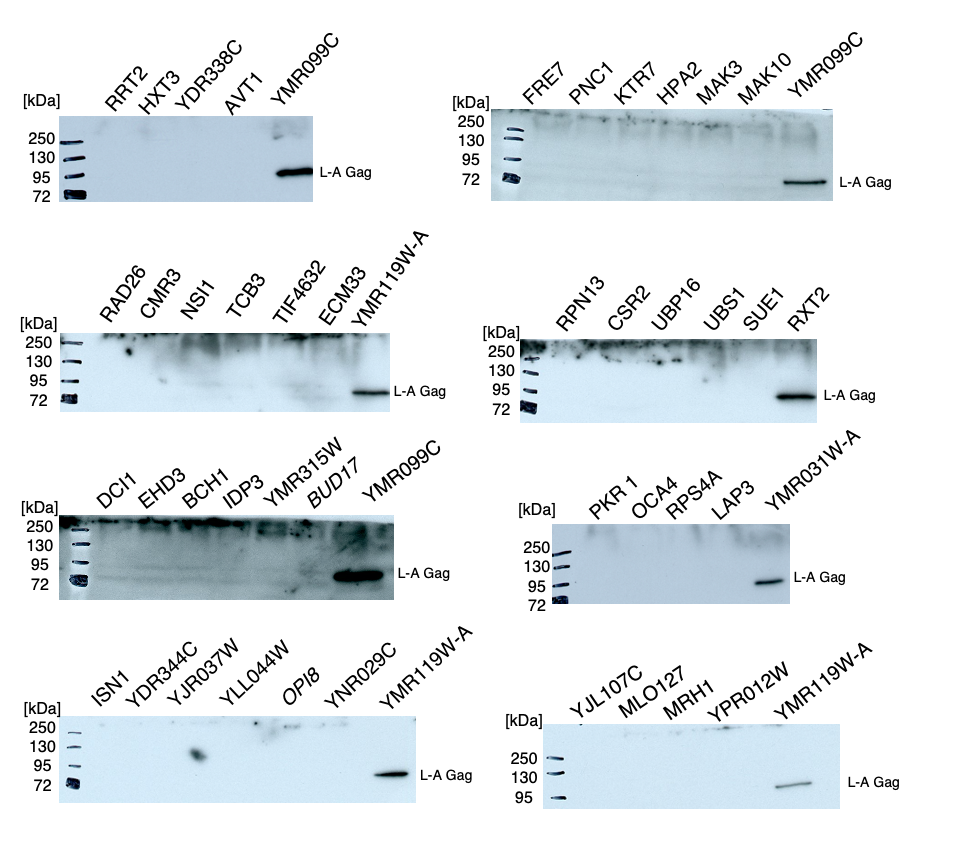


**Supplementary Figure 2.** **Western blotting validation for the L-A virus loss. Shown are sample images from the Western blotting analysis.** Three L-A++ strains *ymr031W-A∆,* *ymr119W-A∆* and *ymr099c∆* (identified in this screen) were used as controls to contrast the loss of the L-A virus in many other knockout strains.


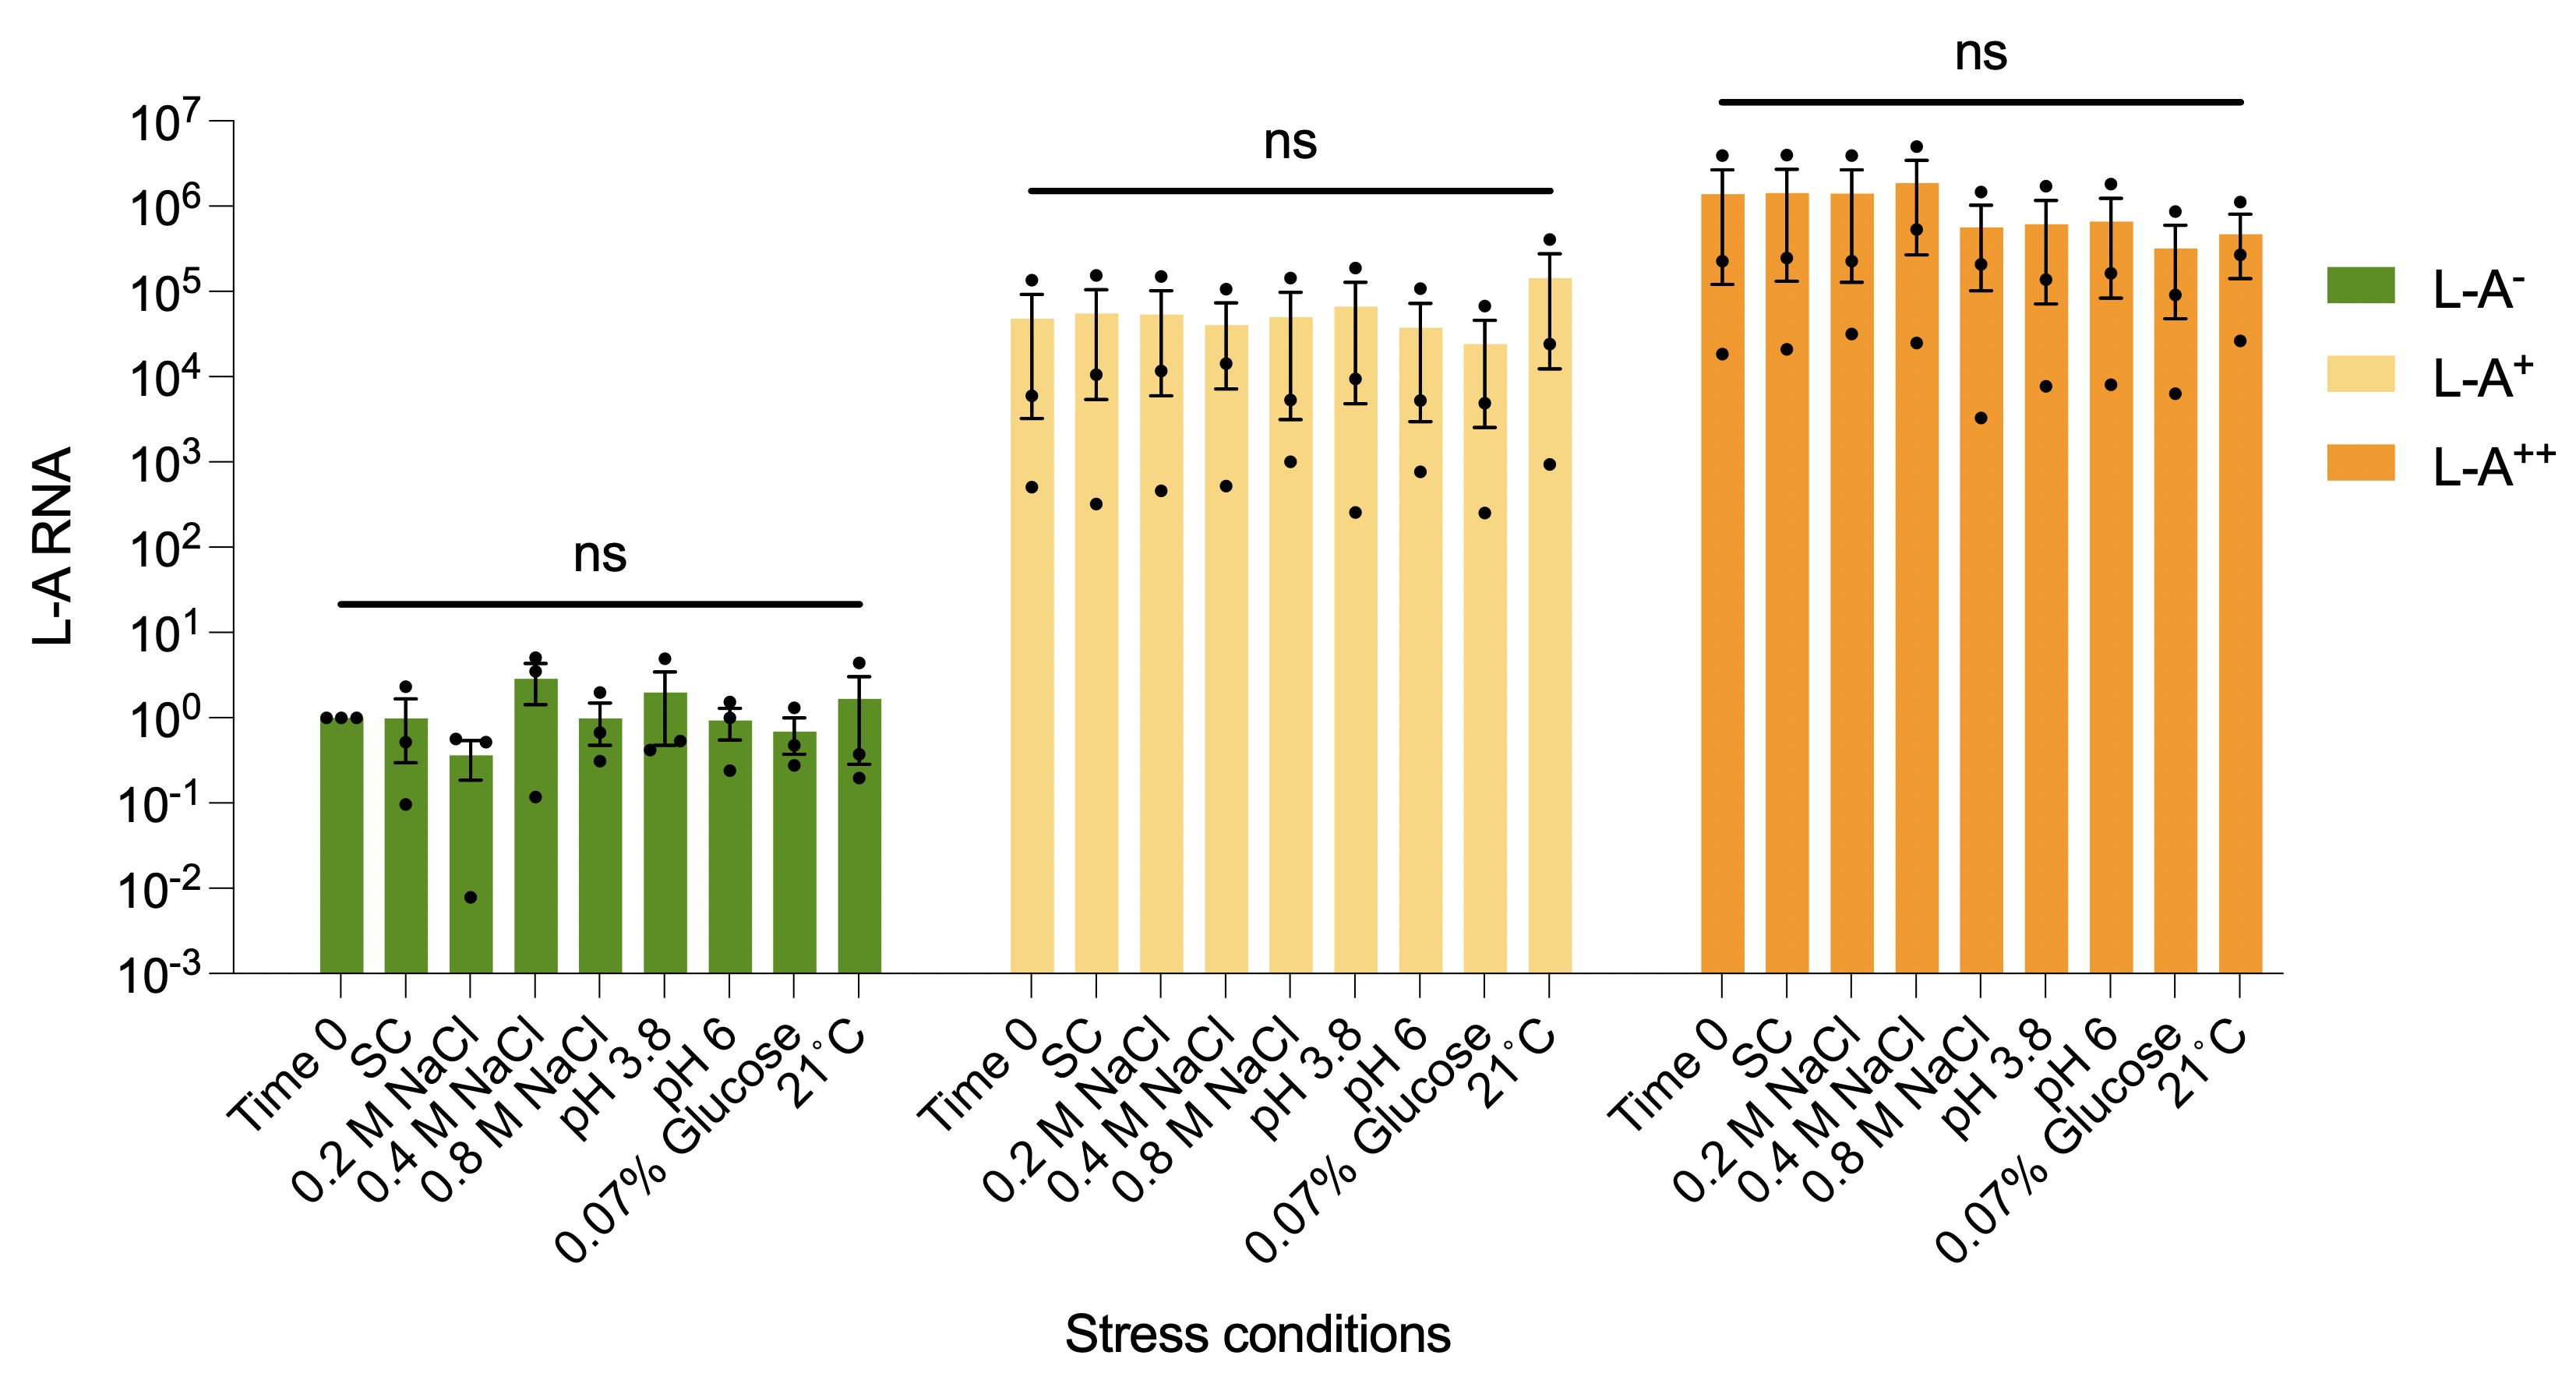

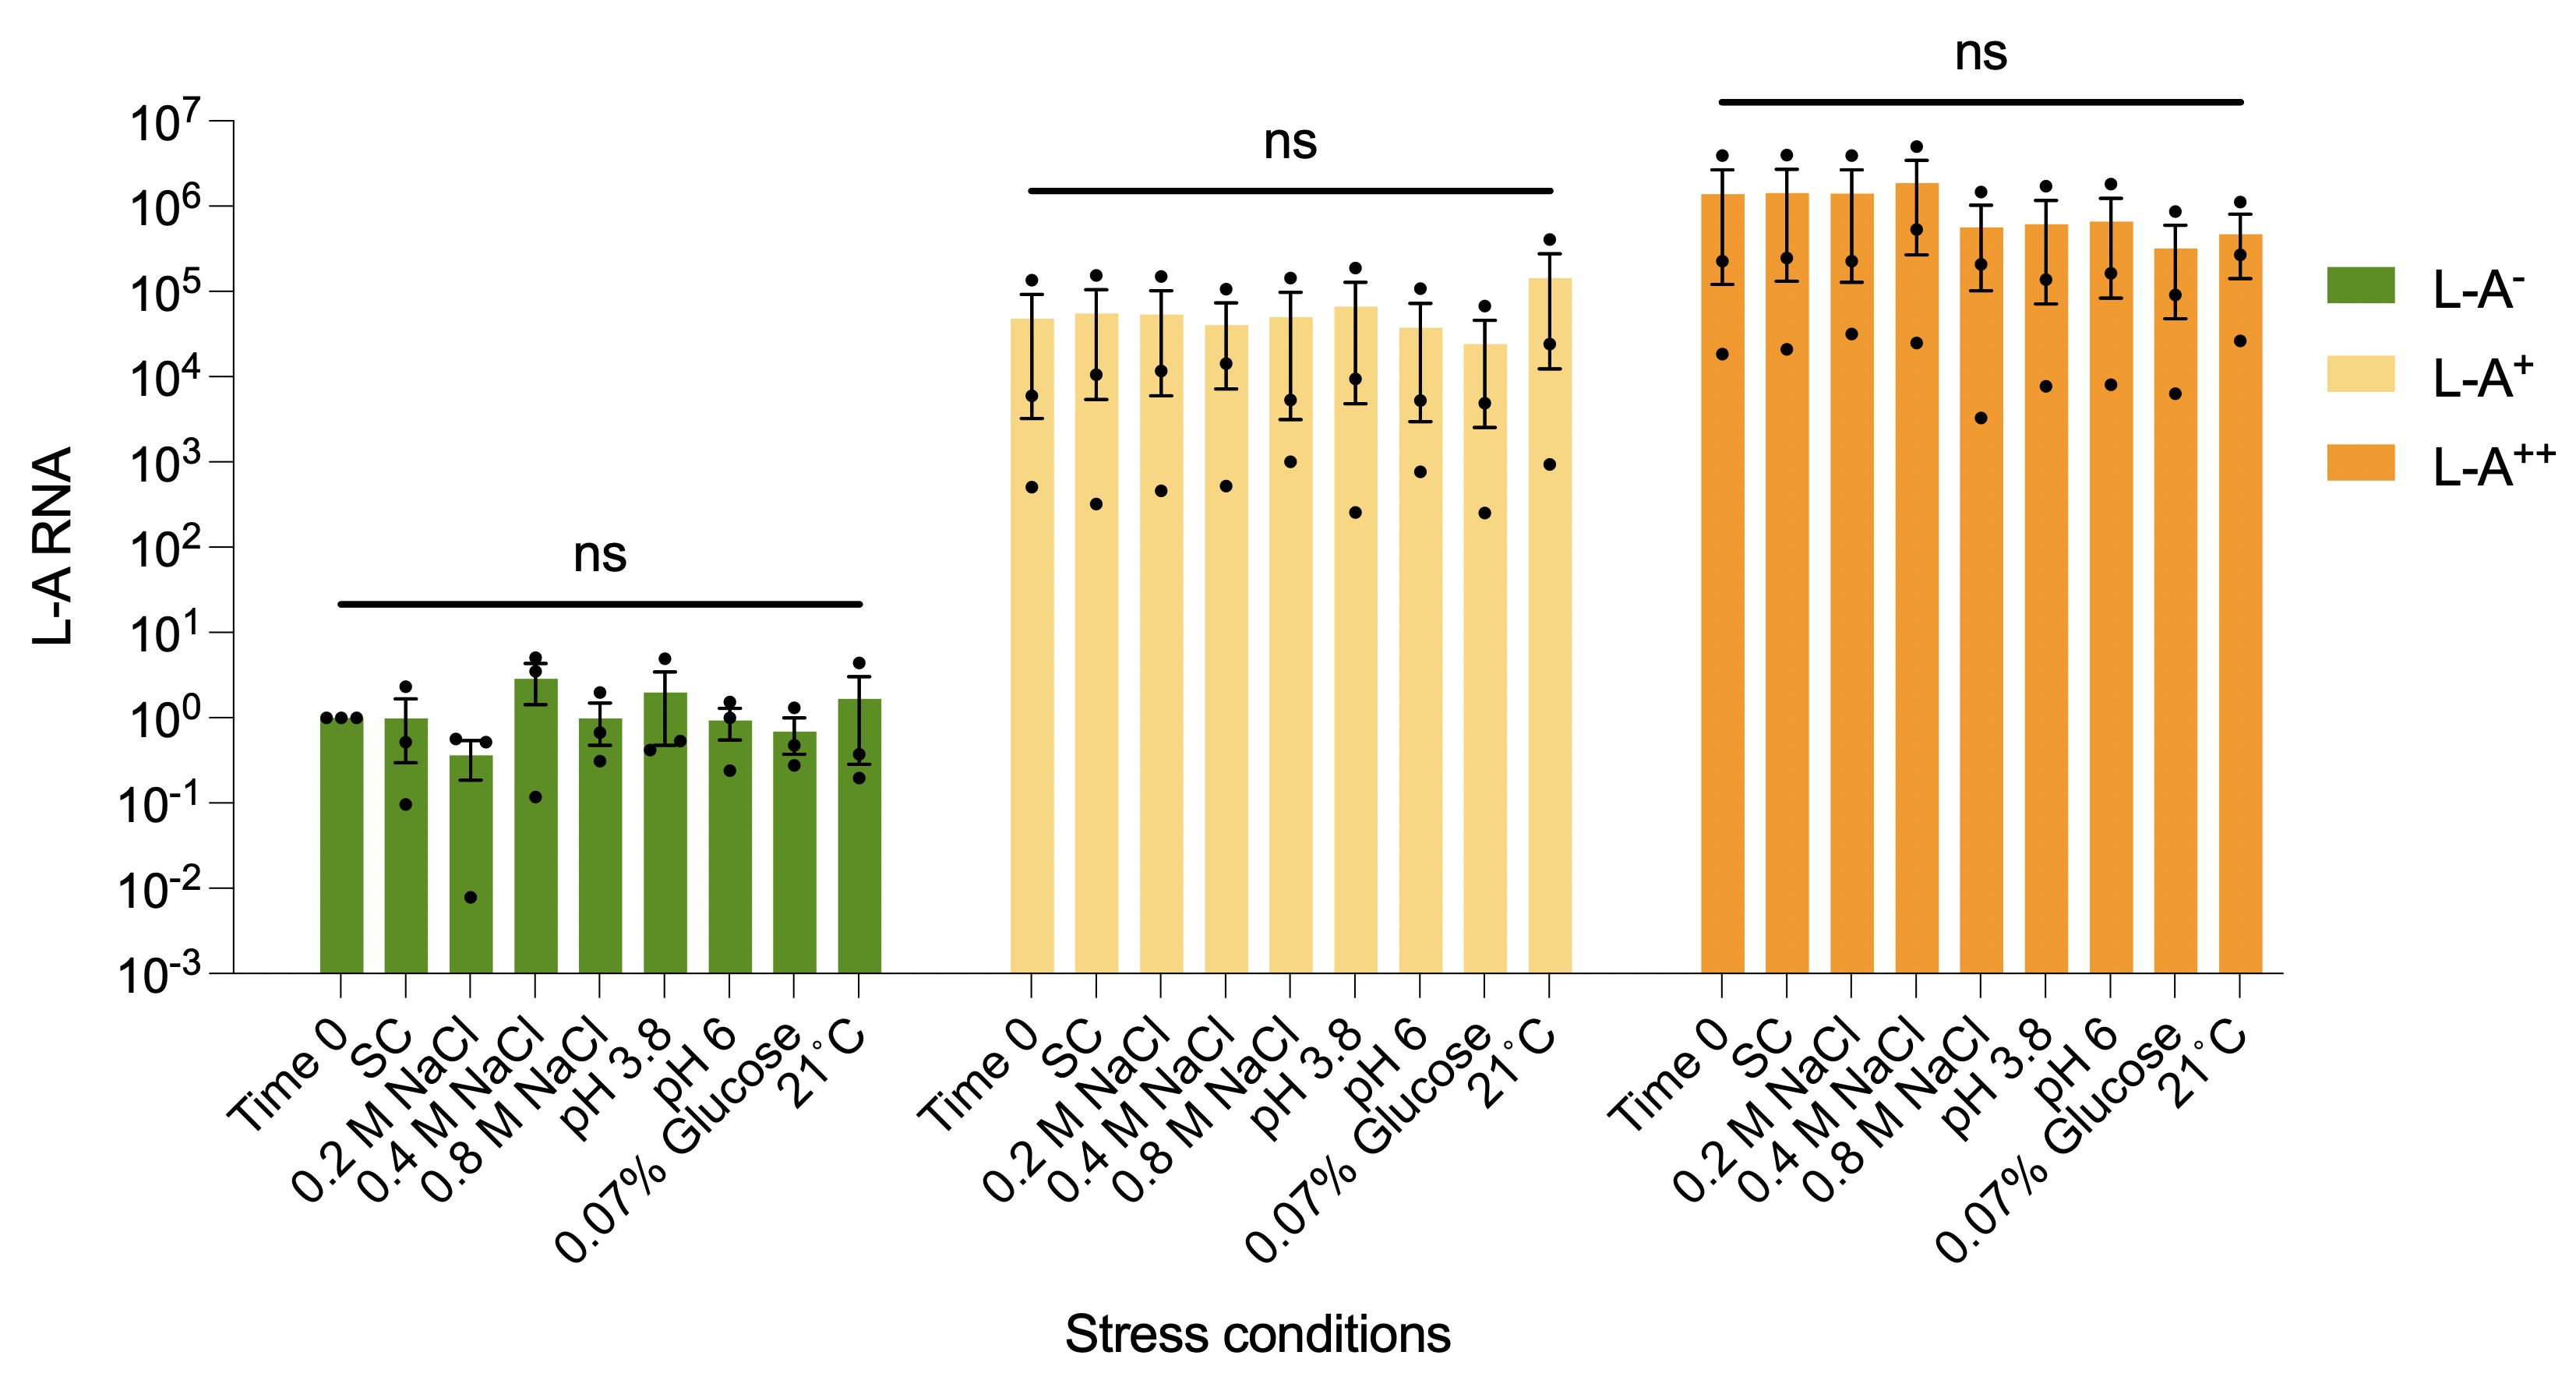


**Supplementary Figure 3.The L-A dsRNA abundance remains constant over the course of the stress processes.** The bar of “Time 0” represents RT-qPCR analysis of the cells withdrawn from the start of the stress process, whereas other bars represent cells analyzed at the end point of the stress process. L-A-, green; L-A+, yellow; L-A++, orange. *N* = 3 biological repeats coupled with 3 technical repeats; error bars are ±SEM; ns, no statistical significance.

**Supplementary Table S1.** Host genes involved in maintaining L-A

| **Standard name** | **Systematic name** | **Function** | **Reference** |
| --- | --- | --- | --- |
| *RRT2* | YBR246W | Endosomal transport |  |
| *HXT3* | YDR345C | Membrane, transmembrane transport |  |
|  | YDR338C | Transmembrane transport |  |
| *AVT1* | YJR001W | Vacuolar amino acid transporter |  |
| *PKR 1* | YMR123W | Vacuolar proton-transporting |  |
| *OCA4* | YCR095C | RNA virus replication | BMV[1] |
| *RPS4A* | YJR145C | RNA binding | HIV, HCV [2, 3] |
| *LAP3* | YNL239W | RNA binding |  |
| *RAD26* | YJR035W | DNA repair | HCV [4] |
| *CMR3* | YPR013C | DNA binding |  |
| *NSI1* | YDR026C | DNA binding |  |
| *TCB3* | YML072C | Lipid binding |  |
| *TIF4632* | YGL049C | Translation initiation factor |  |
| *ECM33* | YBR078W | Paralog: PST1, cell wall organization |  |
| *RPN13* | YLR421C | Ubiquitin binding |  |
| *CSR2* | YPR030W | Ubiquitin binding |  |
| *UBP16* | YPL072W | Protein deubiquitination |  |
| *UBS1* | YBR165W | Ubiquitination and nuclear export |  |
| *SUE1* | YPR151C | Protein catabolic process |  |
| *THI12* | YNL332W | Thiamine biosynthetic process |  |
| *RIM15* | YFL033C | Protein serine/threonine kinase activity |  |
| *SNO4* | YMR322C | Cysteine peptidase activity |  |
| *DCI1* | YOR180C | Peroxisomal protein | TBSV [5] |
| *EHD3* | YDR036C | 3-hydroxyisobutyryl-coa hydrolase |  |
| *BCH1* | YMR237W | Small gtpase binding |  |
| *IDP3* | YNL009W | NADP+ dehydrogenase |  |
|  | YMR315W | Oxidoreductase activity |  |
| *BUD17* | YNR027W | Pyridoxal kinase activity |  |
| *FRE7* | YOL152W | Ferric-chelate reductase activity |  |
| *PNC1* | YGL037C | Nicotinamidase activity |  |
| *KTR7* | YIL085C | Mannosyltransferase activity |  |
| *HPA2* | YPR193C | N-acetyltransferase activity |  |
| *MAK3* | YPR051W | N-acetyltransferase activity | L-A, TBSV [6, 7] |
| *MAK10* | YEL035C | N-acetyltransferase activity | L-A [8] |
| *ISN1* | YOR155C | IMP 5'-nucleotidase activity |  |
|  | YDR344C | Unknow function |  |
|  | YJR037W | Unknow function |  |
|  | YLL044W | Unknow function |  |
| *OPI8* | YKR035C | Unknow function |  |
|  | YNR029C | Unknow function |  |
|  | YJL107C | Unknow function |  |
|  | YPR012W | Unknow function |  |
| *MLO127* | YJR039W | Unknow function |  |
| *MRH1* | YDR033W | Unknow function |  |
|  | YPR039W | Unknow function |  |

**Supplementary Table 2.** Host genes involved in repressing L-A

| **Standard name** | **Systematic name** | **Function** | **Reference** |
| --- | --- | --- | --- |
|  | YMR099C | Carbohydrate metabolism |  |
| *SKI3* | YPR189W | 3'-5' RNA exonuclease | L-A, BMV [7, 9] |
| *MET22* | YOL064C | Bisphosphate-3'-nucleotidase; human homolog BPNT1 | BMV [1] |
| *PEX6* | YNL329C | AAA-peroxins, peroxisome biogenesis |  |
|  | YMR031W-A | Unknown |  |
| *VPS9* | YML097C | Guanine nucleotide exchange factor (GEF) and ubiquitin receptor |  |
|  | YMR119W-A | Unknown |  |

**Supplementary Table 3.** Host genes identified from the *ts*-library involved in maintaining L-A

| **Standard name** | **Systematic name** | **Function** | **Reference** |
| --- | --- | --- | --- |
| *WT* | BY4741 |  |  |
| *TLG2* | YOL018C | T-snare affecting a late Golgi |  |
| *POL1* | YNL102W | Subunit of the DNA polymerase I | TBSV [10] |
| *MRC1* | YCL061C | Mediator of the replication checkpoint |  |
| *LDB19* | YOR322C | Mating and zygote formation, Ub-ligase |  |
| *LAT1* | YNL071W | Dihydrolipoyllysine acetyltransferase |  |
| *MOB2* | YFL034C-B | Protein kinase activator involved in cell polarity | TBSV [11] |
| *YIP1* | YGR172C | Vesicle-mediated transport from EM to the Golgi |  |
| *HDA3* | YPR179C | Subunit of HDA1 histone deacetylase complex |  |
| *TPM1* | YNL079C | Major isoform of tropomyosin (polarized cell growth) |  |
| *SAP30* | YMR263W | Component of Rpd3L histone deacetylase complex | RVFV [12] |
| *SSD1* | YDR293C | Translational repressor; involved in polar growth |  |
| *SUR1* | YPL057C | Subunit of mannosylinositol phosphorylceramide (MIPC) synthase |  |
| *NTF2* | YER009W | Ran GTPase binding protein involved in protein import into nucleus |  |
|  | YGR125W | Vacuolar Storage of arginine |  |
| *BEM2* | YER155C | GTPase activator involved in actin cytoskeleton organization |  |
| *URA6* | YKL024C | Bifunctional adenylate and uridylate kinase |  |
| *SLX9* | YGR081C | G-Quadruplex binding protein, pre-rRNA processing |  |
| *IES1* | YFL013C | Subunit of the INO80 chromatin remodeling complex |  |
| *HDA1* | YNL021W | Subunit of the HDA1 histone deacetylase complex |  |
| *ATP10* | YLR393W | ATP synthase |  |
| *ARC19* | YKL013C | Actin cortical patch organization |  |
| *MOB2* | YFL034C-B | Protein kinase activator involved in cell polarity |  |
| *RCO1* | YMR075W | Component of the Rpd3S histone deacetylase complex |  |
| *UBA4* | YHR111W | Sulfurtransferase and adenylyltransferase | BMV [1] |
| *SNF4* | YGL115W | Sporulation, and peroxisome biogenesis | TBSV [7] |

**Supplementary Table 4.** Host genes identified from the *ts*-library involved in suppressing L-A

| **Standard name** | **Systematic name** | **Function** | **Reference** |
| --- | --- | --- | --- |
| *CDC28* | YBR160W | Cyclin-dependent kinase (CDK), regulator of mitotic and meiotic cell cycles |  |
| *RPT4* | YOR259C | Proteasome regulatory particle assembly | TBSV [10] |
| *PRP4* | YPR178W | Splicing factor | HIV [13] |
| *TAF4* | YMR005W | TFIID subunit, RNA polymerase II transcription initiation | Epstein-Barr virus [14] |
| *SNM1* | YDR478W | Rnase MRP complex subunit, regulated degradation of daughter cell-specific mRNA | TBSV [11, 15] |
| *DBP6* | YNR038W | DEAD-box protein involved in ribosome biogenesis | SARS-CoV-2 [16] |
| *RAP1* | YNL216W | DNA-binding transcription regulator | Polyoma virus [17] |
| *RPC40* | YPR110C | RNA polymerase subunit AC40 |  |
| *ABF1* | YKL112W | DNA binding protein with possible chromatin-reorganizing activity |  |
| *PWP1* | YLR196W | rRNA processing |  |
| *STU1* | YBL034C | Mitotic spindle assemble |  |
| *DBF4* | YDR052C | Regulatory subunit of Cdc7p-Dbf4p kinase complex |  |
| *NSL1* | YPL233W | Chromosome segregation |  |
| *GPI2* | YPL076W | N-acetylglucosaminyltransferase |  |
| *ARF1* | YDL192W | ADP-ribosylation factor | HCV [18] |
| *CDC37* | YDR168W | Regulation of the cell cycle and MAPK signaling |  |
| *ALT1* | YLR089C | Alanine transaminase, alanine biosynthesis and catabolism |  |
| *VPS51* | YKR020W | Vacuolar protein sorting |  |
| *MCD1* | YDL003W | Mitotic chromosome determinant |  |
| *POL5* | YEL055C | Nucleolar rDNA-binding protein involved in rRNA transcription |  |

**References**

1. Kushner DB, Lindenbach BD, Grdzelishvili VZ, Noueiry AO, Paul SM, Ahlquist P. Systematic, genome-wide identification of host genes affecting replication of a positive-strand RNA virus. Proc Natl Acad Sci. 2003;100:15764–9.

2. Naji S, Johnson JR, Krogan NJ, Iii JRY. Host cell interactome of HIV-1 rev includes RNA helicases involved in multiple facets of virus production. Mol Cell Proteomics. 2012;4:M111.015313.

3. Yuhashi K, Ohnishi S, Kodama T, Koike K, Kanamori H. In vitro selection of the 3′-untranslated regions of the human liver mRNA that bind to the HCV nonstructural protein 5B. Virology. 2014;450–451:13–23.

4. Wang S-C, Lai K-R, Li C-Y, Chiang C-S, Yu G-Y, Sakamoto N, et al. The paradoxical effects of different hepatitis C viral loads on host DNA damage and repair abilities. PLOS ONE. 2017;12:e0164281.

5. Serviene E, Shapka N, Cheng C-P, Panavas T, Phuangrat B, Baker J, et al. Genome-wide screen identifies host genes affecting viral RNA recombination. Proc Natl Acad Sci. 2005;102:10545–50.

6. Tercero JC, Wickner RB. MAK3 encodes an N-acetyltransferase whose modification of the L-A gag NH2 terminus is necessary for virus particle assembly. J Biol Chem. 1992;267:20277–81.

7. Panavas T, Serviene E, Brasher J, Nagy PD. Yeast genome-wide screen reveals dissimilar sets of host genes affecting replication of RNA viruses. Proc Natl Acad Sci. 2005;102:7326–31.

8. Lee YJ, Wickner RB. MAK10, a glucose-repressible gene necessary for replication of a dsRNA virus of *Saccharomyces cerevisiae*, has T cell receptor alpha-subunit motifs. Genetics. 1992;132:87–96.

9. Brown JT, Bai X, Johnson AW. The yeast antiviral proteins ski2p, ski3p, and ski8p exist as a complex in vivo. RNA. 2000;6:449–57.

10. Serviene E, Jiang Y, Cheng C-P, Baker J, Nagy PD. Screening of the yeast yTHC collection identifies essential host factors affecting tombusvirus RNA recombination. J Virol. 2006;80:1231–41.

11. Nawaz-ul-Rehman MS, Reddisiva Prasanth K, Baker J, Nagy PD. Yeast screens for host factors in positive-strand RNA virus replication based on a library of temperature-sensitive mutants. Methods. 2013;59:207–16.

12. Mansuroglu Z, Josse T, Gilleron J, Billecocq A, Leger P, Bouloy M, et al. Nonstructural NSs protein of rift valley fever virus interacts with pericentromeric DNA sequences of the host cell, inducing chromosome cohesion and segregation defects. J Virol. 2010;84:928–39.

13. Bennett EM, Lever AML, Allen JF. Human immunodeficiency virus type 2 gag interacts specifically with PRP4, a serine-threonine kinase, and inhibits phosphorylation of splicing factor SF2. J Virol. 2004;78:11303–12.

14. Yang Y-C, Chang L-K. Role of TAF4 in transcriptional activation by Rta of Epstein-Barr virus. PLoS ONE. 2013;8:e54075.

15. Jaag HM, Lu Q, Schmitt ME, Nagy PD. Role of RNase MRP in viral RNA degradation and RNA recombination. J Virol. 2011;85:243–53.

16. Singh A, Pandey KK, Agrawal SK, Srivastava RK, Bhattacharyya S, Verma B. The SARS-CoV-2 UTR’s intrudes host RBP’s and modulates cellular splicing. Adv Virol. 2023;2023:1–11.

17. Pollice A, Ciaramella M, Pulitzer JF. *Saccharomyces cerevisiae* multifunctional protein RAP1 binds to a conserved sequence in the polyoma virus enhancer and is responsible for its transcriptional activity in yeast cells. FEBS Lett. 1993;323:77–82.

18. Zhang L, Hong Z, Lin W, Shao R-X, Goto K, Hsu VW, et al. ARF1 and GBF1 generate a PI4P-enriched environment supportive of hepatitis C virus replication. PLoS ONE. 2012;7:e32135.

**Supplementary Table 5.** Host genes up-regulated by the L-A virus


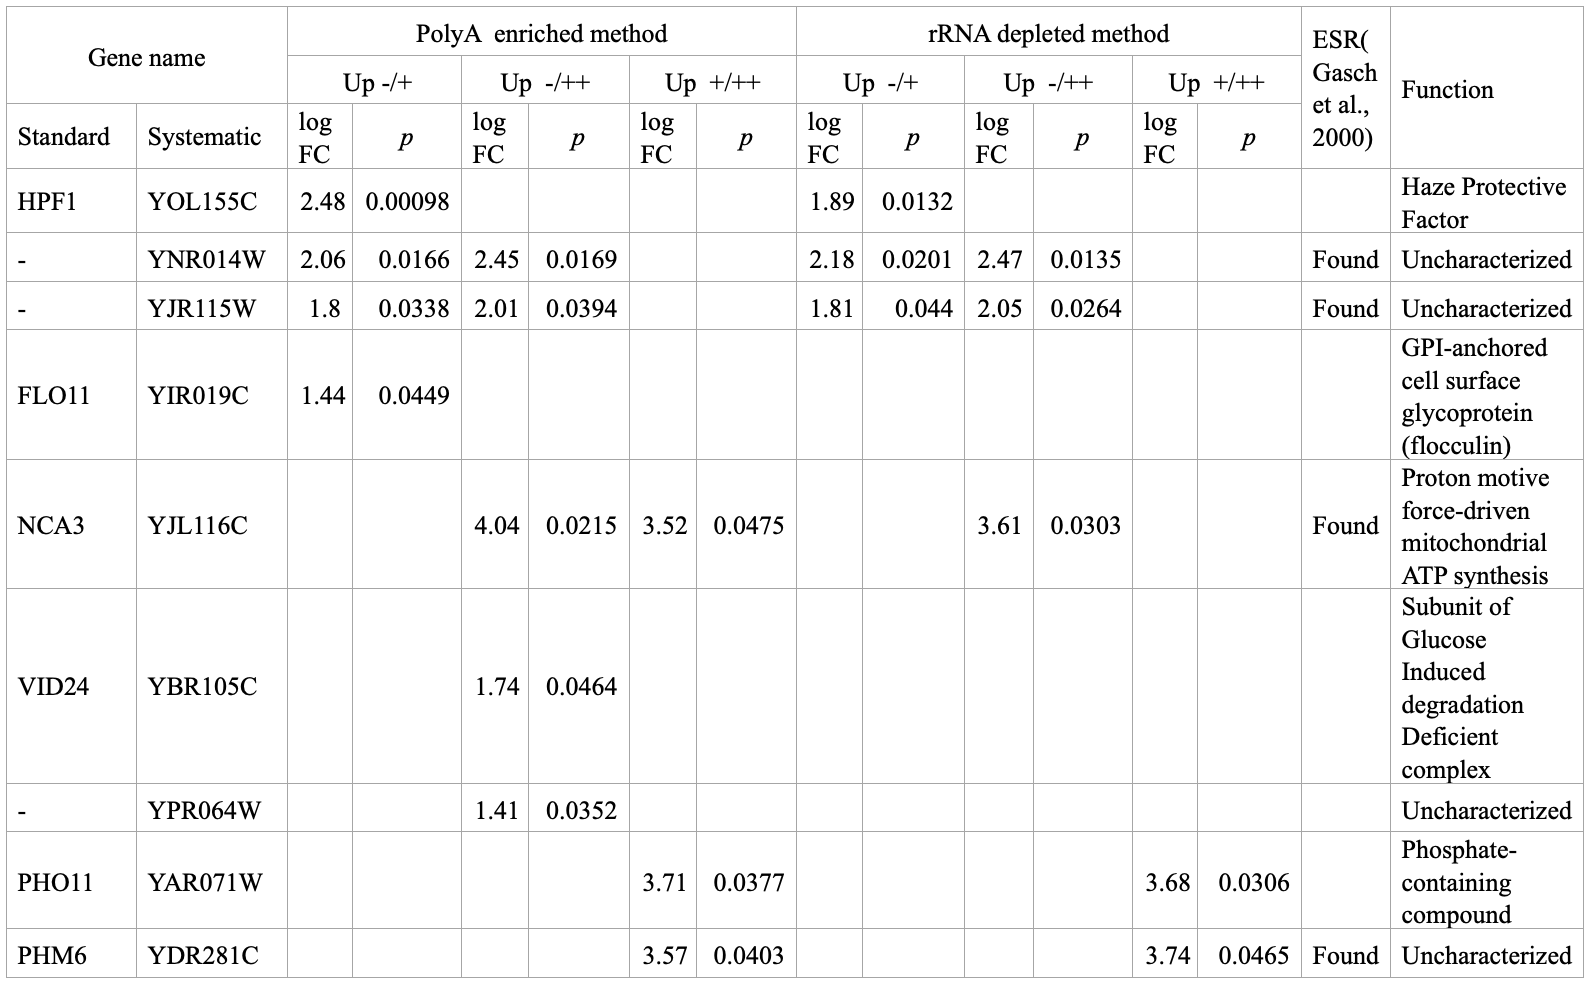


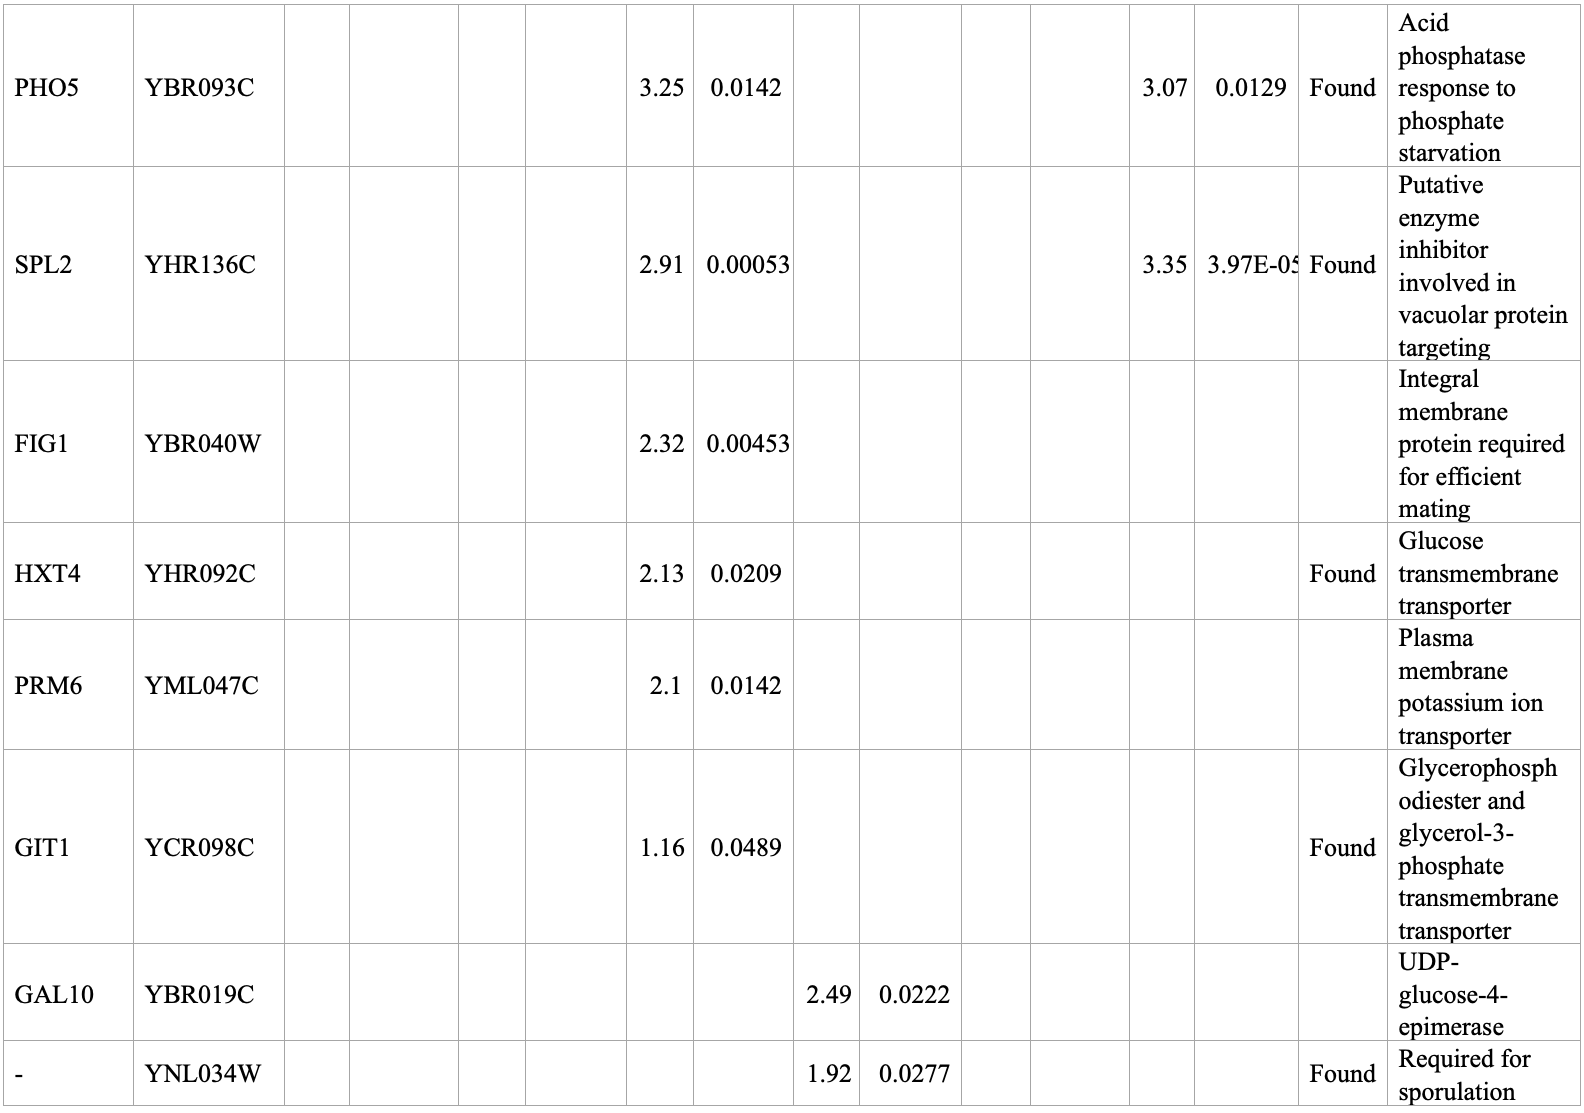


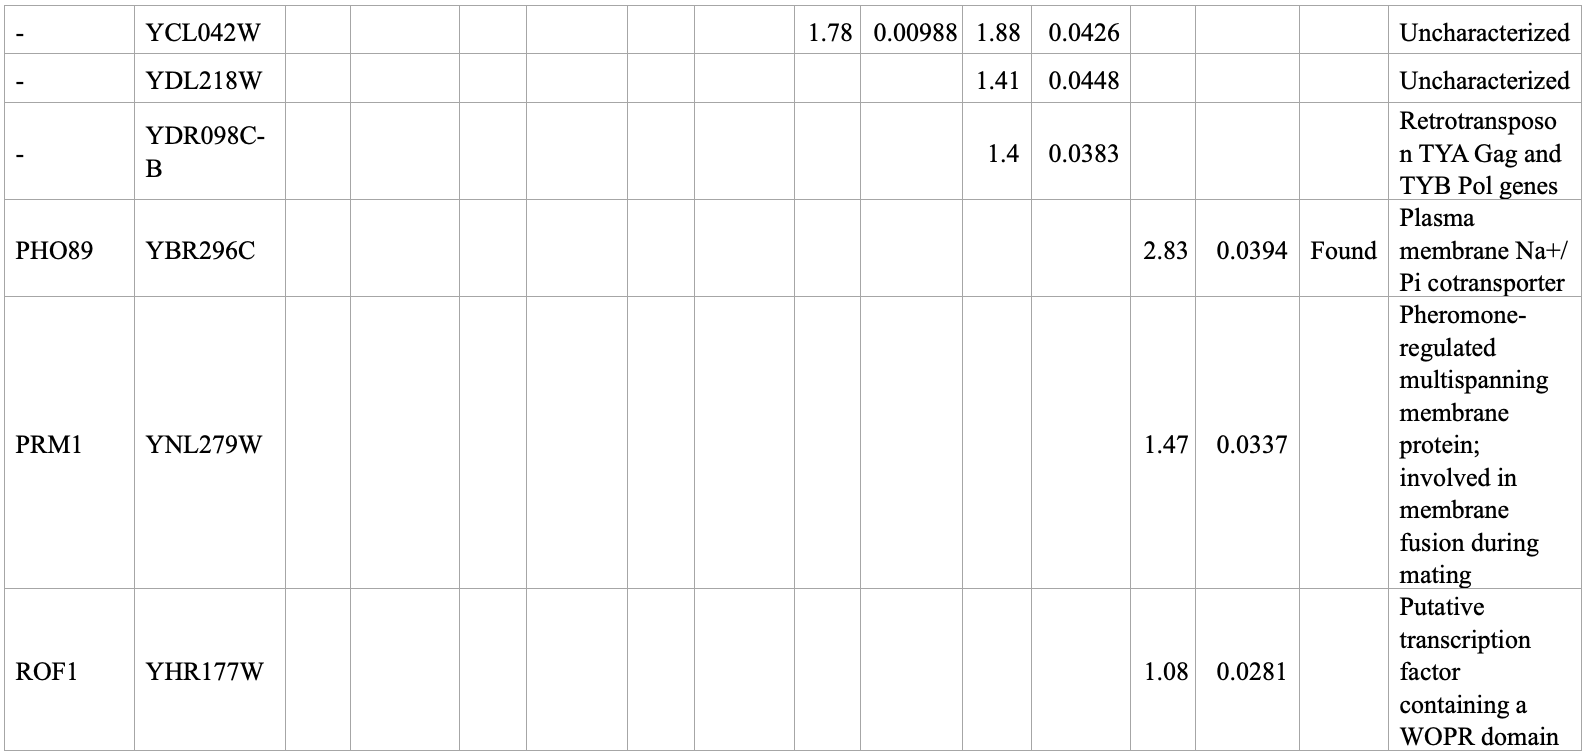


**Supplementary Table 6.** Host genes down-regulated by the L-A virus


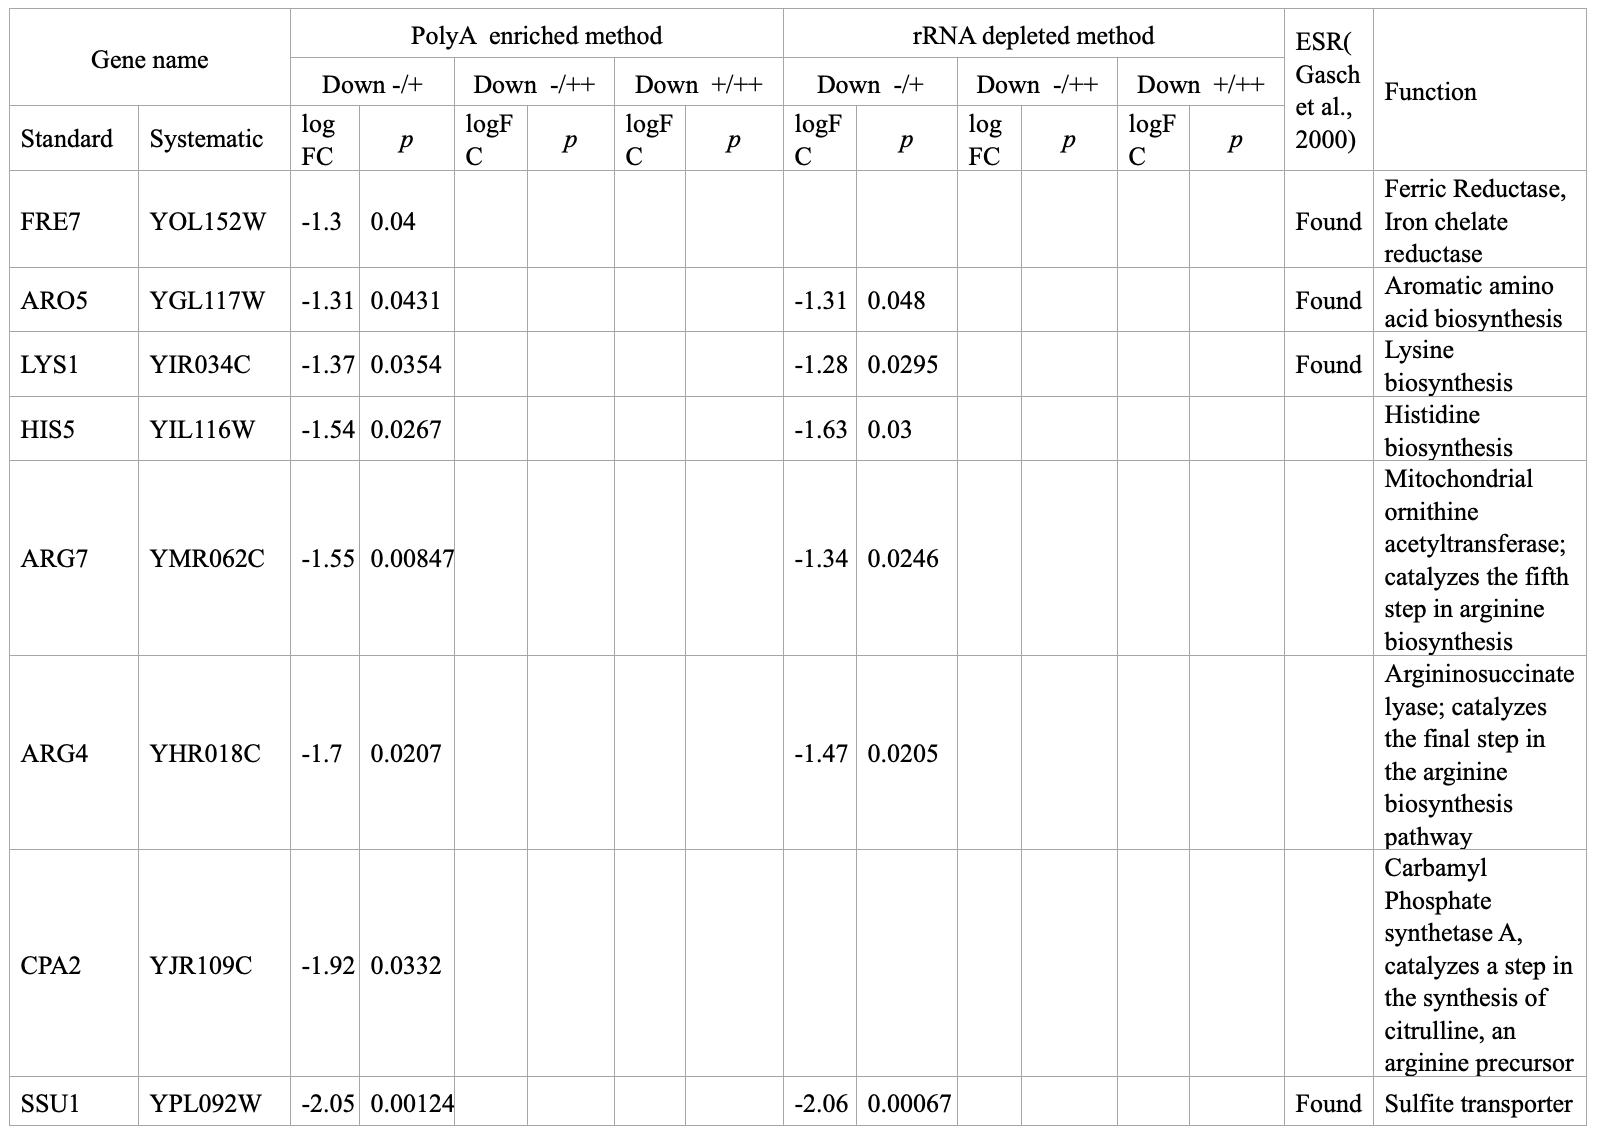


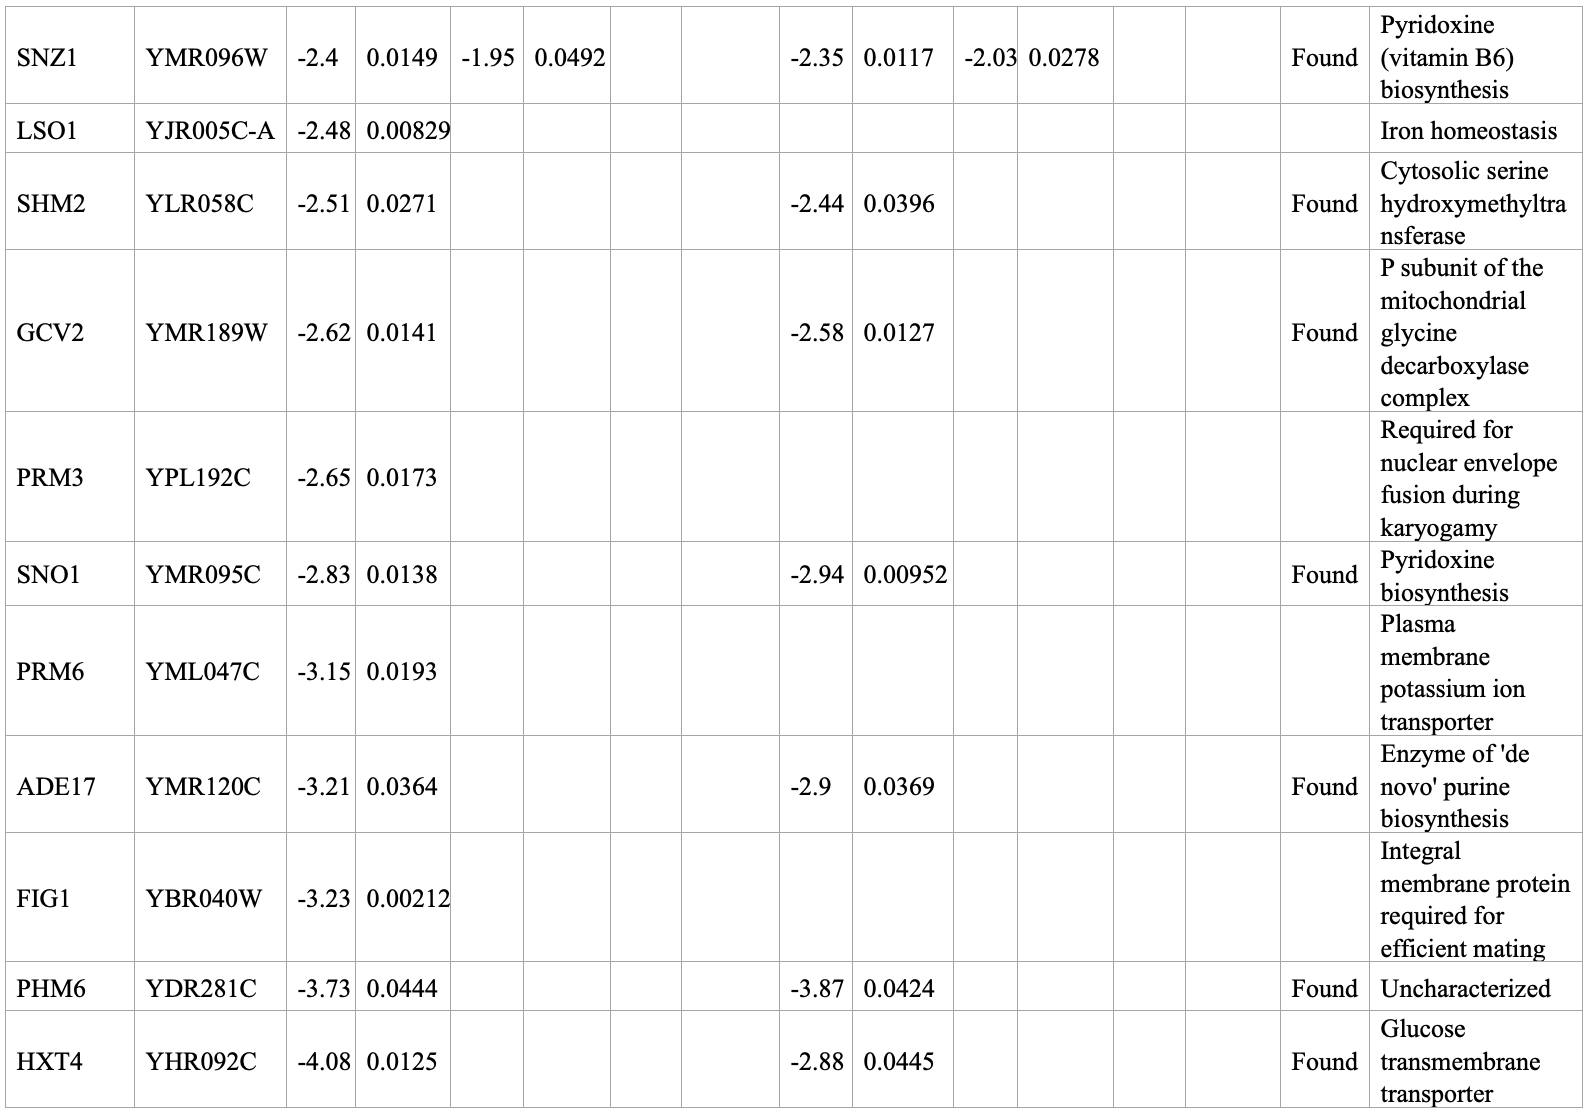


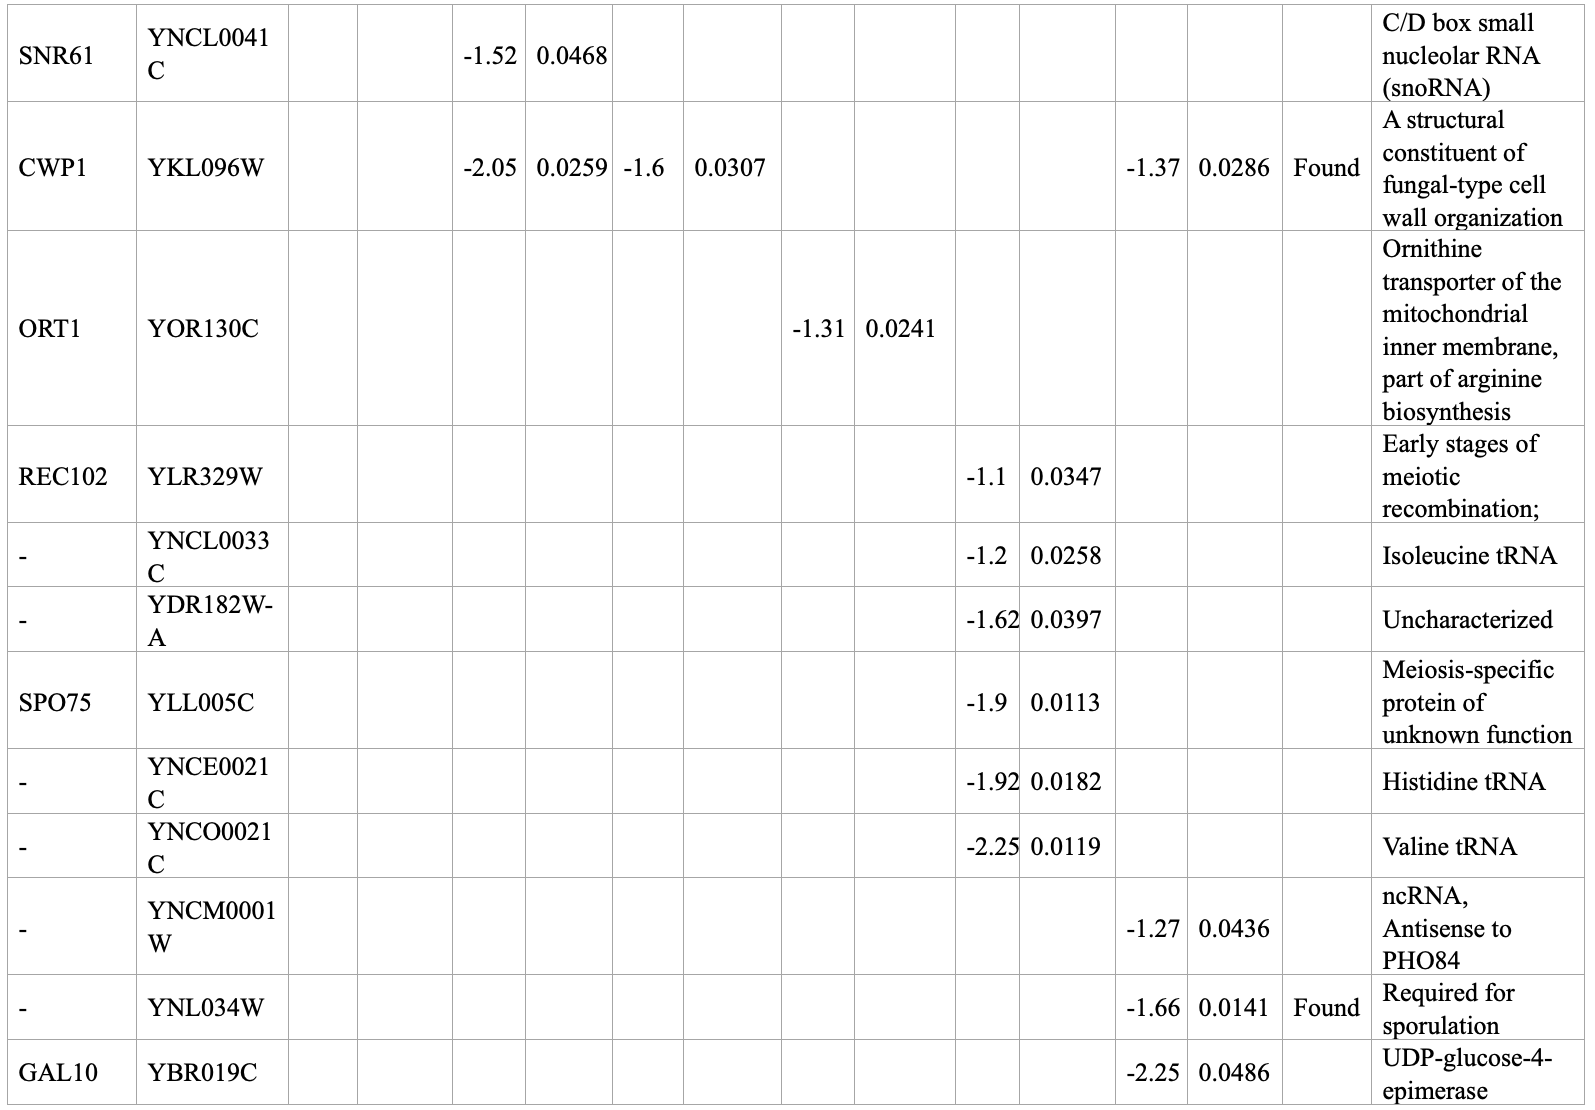


**Supplementary Table 7.** Single nucleotide polymorphism (SNP) uncovered by transcriptomic analysis

|  | L-A- strain (3 isolates) | | | L-A+ strain (3 isolates) | | | L-A++ strain (3 isolates) | | |
| --- | --- | --- | --- | --- | --- | --- | --- | --- | --- |
| No. 1 | No. 2 | No. 3 | No. 1 | No. 2 | No. 3 | No. 1 | No. 2 | No. 3 |
| Number of SNP | 574 | 492 | 530 | 546 | 535 | 530 | 564 | 526 | 579 |
| Unique deletion | 0 | 2 | 0 | 1 | 0 | 1 | 2 | 1 | 2 |

|  | Systematic Name | Standard Name | Nucleotide ID | Position | Change | Function |
| --- | --- | --- | --- | --- | --- | --- |
| L-A- strain  No. 2 | YNL325C | *FIG4* | BK006947.3 | 28780 | C > T | Required for efficient mating and response to osmotic shock |
|  |  | BK006947.3 | 28797 | T > C |  |
|  |  | BK006947.3 | 28948 | C > T |  |
|  |  | BK006947.3 | 28951 | C > T |  |
|  |  | BK006947.3 | 28953 | CCAT > C |  |
|  |  | BK006947.3 | 34243 | T> A |  |
|  |  | BK006947.3 | 34244 | T> A |  |
|  |  | BK006947.3 | 34253 | T> A |  |
|  |  | BK006947.3 | 34262 | T> A |  |
|  |  | BK006947.3 | 34263 | G> A |  |
| YPR042C | *PUF2* | BK006949.2 | 650502 | CTAT> C | PUF family mRNA-binding protein |
|  |  | BK006949.2 | 655061 | T> G |  |
|  |  | BK006949.2 | 655079 | GA> G |  |
|  |  | BK006949.2 | 655107 | T> C |  |
| L-A+ strain  No. 1 | YER177W | *BMH1* | BK006939.2 | 546296 | A> G | Post-transcriptional control of the proteome |
|  |  | BK006939.2 | 546345 | CCAA> C |  |
| L-A+ strain  No. 3 | YMR273C | *ZDS1* | BK006946.2 | 811237 | GGTT> G | Regulating Swe1p-dependent polarized growth |
|  |  | BK006946.2 | 811824 | C> T |  |
| L-A++ strain  No. 1 | YBR150C | *TBS1* | BK006936.2 | 541608 | TTTA> T | Unknown function |
|  |  | BK006936.2 | 544637 | A> G |  |
| YFL067W | *_* | BK006940.2 | 550 | T> G | Unknown function |
|  |  | BK006940.2 | 551 | C> T |  |
|  |  | BK006940.2 | 874 | C> T |  |
|  |  | BK006940.2 | 918 | TTAGTCCTGACGTTGATGCTGGCAGTGGTAGTCGCAC> T |  |
| L-A++ strain  No. 2 | YLR309C | *IMH1* | BK006945.2 | 751291 | ATTT> A | Vesicular transport |
| L-A++ strain  No. 3 | YBR072W | *HSP26* | BK006936.2 | 382160 | C> A | Chaperone involved in protein folding and the cellular response to heat |
|  |  | BK006936.2 | 382466 | ACAAGGT> A |  |
|  |  | BK006936.2 | 382488 | C> A |  |
|  |  | BK006936.2 | 382665 | G> A |  |
|  |  | BK006936.2 | 382666 | G> A |  |
|  |  | BK006936.2 | 382667 | G> A |  |
| YPR120C | *CLB5* | BK006949.2 | 774827 | CCTTCTT> C | B-type cyclin involved in DNA replication during S phase |
